# Supplementary material
Source: publisher figshare collection journal article supplement (https://sage.figshare.com/ndownloader/files/17384594)
Supplement: Supplementary file 1 [file 17384594]

## Appendix A

### Summary of the Studies

| <u>Study details</u>          | <u>Subjects' characteristics</u>                                                                                                                             | <u>Intervention</u>                                                                                                         | <u>Type of control group</u>                                                             | <u>Outcome</u>                                      | <u>Aim</u>                           |
|-------------------------------|--------------------------------------------------------------------------------------------------------------------------------------------------------------|-----------------------------------------------------------------------------------------------------------------------------|------------------------------------------------------------------------------------------|-----------------------------------------------------|--------------------------------------|
| Author (year);<br>Country     | Main diagnosis/population; Sample size [Exp = $n$ , mean age (range or $SD$ ), Male, Female] & [Con = $n$ , mean age (range or $SD$ ), Male, Female]         | Intervention type; Intervener of acupressure (applied acupoints);<br>Duration, Frequency, Intervention period               |                                                                                          |                                                     |                                      |
| Chan et al. (2017); Hong Kong | Frail older people in community; $N = 106$ [Exp = 54, 76.33 ( $SD = 6.52$ ), $M = 18$ , $F = 36$ ] & [Con = 52, 75.90 ( $SD = 7.68$ ), $M = 14$ , $F = 38$ ] | AP; Caregivers (HN3, GV24, BL2, TE23, EX-HN5, GB14, SI18, LI20, ST6, ST4, HN24, GB20, GB21, SI11, LI4); 15 min, 4/wk, 12 wk | Received the same treatment after completing the control group activities and assessment | PSQI, Visual Analogue Scale (VAS), WHOQOL-BREF (HK) | Sleep quality, pain, quality of life |
| Chen (2013); China            | Hypertension and sleep disorder patients; $N = 116$ [Exp = 58] & [Con = 58], Age range 74-96, $M = 66$ , $F = 50$                                            | AP; Nurse (GV23, EX-HN3, ST8, BL2, TE23, EX-HN5, GV20, GB20, GB21, KI1, KI3, SP6, ST36); 20-30 min, 7/wk, 4 wk              | Estazolam 2 mg orally at night and conventional care                                     | Spiegel Sleep Inventory (SSI)                       | Sleep quality                        |

|                                    |                                                                                                                                                                                                                                           |                                                                                   |                                                                                                                                                                                                                                                                                                                        |                                                                                  |                |
|------------------------------------|-------------------------------------------------------------------------------------------------------------------------------------------------------------------------------------------------------------------------------------------|-----------------------------------------------------------------------------------|------------------------------------------------------------------------------------------------------------------------------------------------------------------------------------------------------------------------------------------------------------------------------------------------------------------------|----------------------------------------------------------------------------------|----------------|
| Chen et al.<br>(2016); China       | Poor sleep quality patients; $N = 100$<br>[Exp = 50, 69.89 ( $SD = 10.03$ )] & [Con<br>= 50, 70.09 ( $SD = 11.23$ )]                                                                                                                      | AP; Nurse (EX-HN5, EX-HN22,<br>PC6, HT7, SP6, ST36); 50/acupoint,<br>NR, 8 wk     | Explanation of sleep<br>quality information                                                                                                                                                                                                                                                                            | PSQI                                                                             | Sleep quality  |
| Kwan et al.,<br>2017; Hong<br>Kong | Nursing home residents<br>with Dementia; $N = 119$ [Exp = 39,<br>86.9 ( $SD = 6.1$ ), $M = 8$ , $F = 31$ ]<br>& [Sham = 41, 85.6 ( $SD = 6.9$ ), $M = 12$ ,<br>$F = 29$ ] & [Usual care = 39, 87.1 ( $SD =$<br>5.9), $M = 7$ , $F = 32$ ] | AP; trained assistants (GV20, HT7,<br>EX-HN3, GB20, PC6) ; 10 min,<br>10/wk, 2 wk | Sham -These were located<br>on (1) the nasal bone, (2)<br>the olecranon, (3) the<br>styloid process of the ulna,<br>(4) the medial malleolus<br>over the ankle, and (5) the<br>head of the fibula. Usual<br>care- Usual care provided<br>by the residential care<br>homes to manage agitated<br>residents<br>every day | Cohen-Mansfield<br>Agitation Inventory<br>(CMAI); and on<br>salivary<br>cortisol | Agitation      |
| Lai et al.                         | Nursing home residents; $N = 62$ [Exp =                                                                                                                                                                                                   | AP; Specialists (BL10, CV14, KI1,                                                 | A massage at locations                                                                                                                                                                                                                                                                                                 | PSQI, SF-36                                                                      | Sleep quality, |

|                                    |                                                                                                                                                                                                                                |                                                                                                                                                                                        |                                                                                                                     |                     |                                         |
|------------------------------------|--------------------------------------------------------------------------------------------------------------------------------------------------------------------------------------------------------------------------------|----------------------------------------------------------------------------------------------------------------------------------------------------------------------------------------|---------------------------------------------------------------------------------------------------------------------|---------------------|-----------------------------------------|
| (2017);<br>Taiwan                  | 31 (range 65-81), M = 12, F = 19] &<br>[Con = 31 (range 71-81), M = 8, F =<br>23]                                                                                                                                              | GV20, PC6); 24 min, 3/wk, 8 wk                                                                                                                                                         | with no acupoints, which<br>were 10 mm from the true<br>points                                                      |                     | quality of life                         |
| Lei et al.<br>(2015); China        | Hypertensive patients; <i>N</i> = 68 [Exp =<br>34, 71.3 ( <i>SD</i> = 7.2), M = 19, F = 15] &<br>[Con = 34, 72.8 ( <i>SD</i> = 6.8), M = 17, F<br>= 17]                                                                        | AP; self (EX-HN14, GB20,<br>EX-HN5, HT7, PC6, SP6);<br>40-50/acupoint, 28/wk, 4 wk                                                                                                     | Guidance of mental health<br>and education of sleep<br>knowledge                                                    | PSQI, MMSE          | Sleep quality,<br>cognitive<br>function |
| Li et al.<br>(2014a);<br>China     | Hypertensive patients; <i>N</i> = 68 [Exp =<br>34, 73.3 ( <i>SD</i> = 7.1), M = 16, F = 18] &<br>[Con = 33, 73.1 ( <i>SD</i> = 6.8), M = 18, F<br>= 15]                                                                        | AP; self (EX-HN5, EX-HN22, HT7,<br>PC6, SP6); 50/acupoint, NA, 12 wk                                                                                                                   | Education regarding sleep<br>quality and counseling                                                                 | PSQI, MMSE          | Sleep quality,<br>cognitive<br>function |
| Li et al.<br>(2014b); Hong<br>Kong | Residential care home residents; <i>N</i> =<br>90 [Exp = 31, 84.2 ( <i>SD</i> = 7.29), M = 6,<br>F = 25] & [Placebo = 28, 83.8 ( <i>SD</i> =<br>7.19), M = 7, F = 21] & [Con = 31,<br>86.9 ( <i>SD</i> = 8.01), M = 7, F = 24] | AA; self (Ear large intestine, rectum,<br>san jiao, spleen, lung, sympathesis,<br>subcortex); NR, NR, 10 days<br>Participants in the experimental<br>group received AA using auricular | Participants in<br>placebo-controlled group<br>received AA using<br>auricular plasters with<br>Semen Vaccariae; and | PAC-SYM,<br>PAC-QOL | Constipation,<br>quality of life        |

|                             |                                                                                                                                                                     | plasters with magnetic pellets                             | participants in usual care<br>group received AA using<br>only auricular plasters. |                                    |               |
|-----------------------------|---------------------------------------------------------------------------------------------------------------------------------------------------------------------|------------------------------------------------------------|-----------------------------------------------------------------------------------|------------------------------------|---------------|
| Liu et al.<br>(2017); China | Constipation patients; $N = 100$ [Exp = 50, 69.18 ( $SD = 5.8$ ), $M = 21$ , $F = 29$ ] & [Con = 50, 68.88 ( $SD = 5.4$ ), $M = 22$ , $F = 28$ ]                    | AP; NR (CV4, CV12, ST25), 30/acupoint, 21/wk, 4 wk         | Bisacodyl 5 mg once a day orally                                                  | Number of bowel movements per week | Constipation  |
| Lu et al.<br>(2013); Taiwan | Psychogeriatric inpatients; $N = 60$ [Exp = 30, 71.13 ( $SD = 3.65$ ), $M = 19$ , $F = 11$ ] & [Con = 30, 68.07 ( $SD = 2.18$ ), $M = 12$ , $F = 18$ ]              | AP; Nurse (HT7, KI1, PC6); 9 min, 7/wk, 4 wk               | Standard medical care                                                             | PSQI                               | Sleep quality |
| Mo et al.<br>(2015); China  | Hip fracture complicated with constipation; $N = 133$ [Exp = 66, 81.6 ( $SD = 8.2$ ), $M = 21$ , $F = 45$ ] & [Con = 67, 81.2 ( $SD = 8.3$ ), $M = 23$ , $F = 44$ ] | AP; Nurse (ST25, CV6, CV12, ST37); 30/acupoint, 5/wk, 1 wk | Conventional care                                                                 | Successful bowel movement          | Constipation  |

|                                         |                                                                                                                                                                                |                                                                                    |                                                                     |                                                                            |                                     |
|-----------------------------------------|--------------------------------------------------------------------------------------------------------------------------------------------------------------------------------|------------------------------------------------------------------------------------|---------------------------------------------------------------------|----------------------------------------------------------------------------|-------------------------------------|
| Rodríguez-Mansilla et al. (2015); Spain | Dementia institutionalized in residential homes; $N = 110$ [Exp (AA) = 40] & [Exp (Massage therapy) = 35] & [Con = 35]                                                         | AA; a qualified acupuncturist (Ear Shenmen, Myorelaxant, Xin Heart); NR, NR, 12 wk | MT: massage therapy<br>Con: continued with their routine activities | Doloplus-2 scale, Cornell Scale for depression in dementia, Campbell scale | Pain, anxiety, depression           |
| Sun et al. (2015); China                | Community older adults with mild cognitive dysfunction; $N = 76$ [Exp = 38, 70.8 ( $SD = 6.5$ ), $M = 12$ , $F = 26$ ] & [Con = 38, 70.3 ( $SD = 3.9$ ), $M = 10$ , $F = 28$ ] | AP; self (EX-HN5, GV20, EX-HN1, GV24, GB20); 15-20 min, 3/day, 24 wk               | Health education                                                    | MMSE                                                                       | Cognitive function                  |
| Wan et al. (2017); China                | Community individuals with Dementia; $N = 80$ [Exp = 42, 77.56 ( $SD = 6.06$ ), $M = 14$ , $F = 38$ ] & [Con = 38, 77.44 ( $SD = 6.33$ ), $M = 12$ , $F = 26$ ]                | AP; self (EX-HN 5, GV20, EX-HN1, GV24, GB20); 15 min, 2/d, 24 wk                   | Conventional care                                                   | MMSE, QOL-AD                                                               | Cognitive function, quality of life |
| Wu (2012); China                        | Patients with musculoskeletal conditions or orthopedic trauma; $N =$                                                                                                           | AP; NR (CV12, CV4, ST25, ST 36); 20 min, 2/d, 3 days                               | Health education                                                    | Successful bowel movements in 72                                           | Constipation                        |

160 [Exp = 84, 76.2, M = 36, F = 48]

hours

& [Con = 76, 77, M = 39, F = 37]

|                              |                                                                                                                                       |                                                                                                                                                         |                                                                                                |                                                                                   |                                   |
|------------------------------|---------------------------------------------------------------------------------------------------------------------------------------|---------------------------------------------------------------------------------------------------------------------------------------------------------|------------------------------------------------------------------------------------------------|-----------------------------------------------------------------------------------|-----------------------------------|
| Yeh et al.<br>(2014); USA    | Chronic low back pain; $N = 37$ [Exp = 19, 70.6 ( $SD = 4.67$ ), M = 4, F = 15] & [Sham = 18, 76.7 ( $SD = 7$ ), M = 7, F = 11]       | AA; self (Ear shenmen, sympathetic, Sham APA, on each ear at nervous subcortex, active points corresponding to chronic low back pain); 3 min, 3/d, 4 wk | least 3 times a day for 3 minutes each time / Ear stomach, mouth, duodenum, and eye acupoints. | Worst pain (BPI-sf)                                                               | Pain                              |
| Zeng et al.<br>(2016); China | Impaired sleep quality; $N = 82$ [Exp = 42, 70.07 ( $SD = 7.42$ ), M = 15, F = 27] & [Con = 40, 70.78 ( $SD = 7.26$ ), M = 9, F = 31] | AP; self (EX-HN22, PC6, HT7, SP6); 30 min, 2/d, 12 months                                                                                               | Sleep health instructions                                                                      | PSQI, MMSE                                                                        | Sleep quality, cognitive function |
| Zhou (2014);<br>China        | Patients who underwent hernia repair surgery; $N = 100$ [Exp = 50, 67.46] & [Con = 50, 66.86]                                         | AP + conventional post-surgery care; NR (BL25, ST25, ST 36, ST37); 12 min, 3/d, 3 days                                                                  | Conventional post-surgery care                                                                 | Patients' primary complaint is bloating; assessed by first instance of flatulence | Flatulence                        |

*Note.* AA: Auricular acupressure; AP: Acupressure; MMSE: Mini-Mental State Examination; NA: Not available NR: Not reported; SF-36: 36-Item Short Form Health Survey; PAC-SYM: Patient Assessment of Constipation—Symptom Questionnaire; PAC-QOL: Patient Assessment of Constipation—Quality of Life; PSQI: Pittsburgh Sleep Quality Index; BPI-sf: Brief Pain Inventory short form; QOL-AD: Quality of Life in Alzheimer’s Disease; WHOQOL-BREF (HK): The Hong Kong Chinese version of the WHO Quality of Life-BRE

**Appendix B****Systematic Review Protocol****Title:**

Systematic Review and Meta-Analysis on Using Acupressure to Promote the Health of Older Adults

**Review question(s)**

What is the effect of acupressure for health promotion of older adults?

**Search strategy**

Studies published between 2012 and 2017 were searched for in the electronic databases of Medline, PubMed, Cumulative Index of Nursing and Allied Health Literature (CINAHL), PsycINFO, ProQuest Health & Medical Complete, Cochrane Library, Embase, Web of Science, Allied and Complementary Medicine Database (AMED), Chinese Electronic Periodical Services (CEPS), and WANFANG DATA. The search keywords were acupressure (or acupress\*, shiatsu, Zhi Ya, acupuncture points, acupoints, acupoint, acupoint\*) and aged (or aging, elder, elderly, geriatric, or older adults, senior, elders, geriatr\*, older person\*, older patient\*, older patient\*, older women, old women, older men, old men, old adult\*, older adult\*, older individual, older individuals, old people, oldest old, Nonagenarians, Nonagenarian, Octogenarians, Octogenarian, Centenarians, Centenarian, septuagenarian, septuagenarians, older population, aging population, geront\*, old-aged, old-age).

**Inclusion criteria:**

The pre-specified inclusion criteria were:

- Studies that adopted acupressure as the primary intervention.
- Studies whose participants were older adults.



- Studies that were randomized clinical trials.

### **Exclusion criteria:**

The exclusion criteria were:

- Studies that were case reports.
- Studies written in a language other than Chinese or English.
- Studies in which other treatment methods were used as the intervention in addition to acupressure and the sole effect of the acupressure could not be identified.

### **Participants/Population of interest**

Respondents must be older adults.

### **Outcome(s)**

The relation between acupressure and other variables.

### **Quality assessment:**

Two reviewers trained in empirical research and traditional Chinese medicine independently evaluated the full text of potentially eligible studies. Inclusion of studies in this systematic review was determined by the agreement of both reviewers. Disagreements were resolved through discussion and consensus in the presence of a third reviewer. Prior to the meta-analysis, the Modified Jadad Scale was used to assess the quality of the potentially eligible studies identified by the two reviewers. Each domain is given a value of 1 point, and the total score ranges from 0 to 8; a higher score represents a higher research quality. Scores of 0-3 are considered having poor research quality and 4-8 suggest a high research quality. Therefore, studies that were scored 4 or higher were included in the present analysis.

### **Data extraction:**

Data extracted comprised: Study details (author, year, country), setting (location of study), subjects' characteristics (main diagnosis/population; sample size), intervention (intervention type, intervener of acupressure, applied acupoints, duration, frequency, intervention period), type of control group, outcome, aim.

**Language**

Chinese or English

## Appendix C PRISMA 2009 Checklist

| Section/topic                      | #  | Checklist item                                                                                                                                                                                                                                                                                              | Reported on page #      |
|------------------------------------|----|-------------------------------------------------------------------------------------------------------------------------------------------------------------------------------------------------------------------------------------------------------------------------------------------------------------|-------------------------|
| <b>TITLE</b>                       |    |                                                                                                                                                                                                                                                                                                             |                         |
| Title                              | 1  | Identify the report as a systematic review, meta-analysis, or both.                                                                                                                                                                                                                                         | Title page              |
| <b>ABSTRACT</b>                    |    |                                                                                                                                                                                                                                                                                                             |                         |
| Structured summary                 | 2  | Provide a structured summary including, as applicable: background; objectives; data sources; study eligibility criteria, participants, and interventions; study appraisal and synthesis methods; results; limitations; conclusions and implications of key findings; systematic review registration number. | p.1                     |
| <b>INTRODUCTION</b>                |    |                                                                                                                                                                                                                                                                                                             |                         |
| Rationale                          | 3  | Describe the rationale for the review in the context of what is already known.                                                                                                                                                                                                                              | pp. 2-4                 |
| Objectives                         | 4  | Provide an explicit statement of questions being addressed with reference to participants, interventions, comparisons, outcomes, and study design (PICOS).                                                                                                                                                  | p. 4                    |
| <b>METHODS</b>                     |    |                                                                                                                                                                                                                                                                                                             |                         |
| Protocol and registration          | 5  | Indicate if a review protocol exists, if and where it can be accessed (e.g., Web address), and, if available, provide registration information including registration number.                                                                                                                               | p.5, Appendix B         |
| Eligibility criteria               | 6  | Specify study characteristics (e.g., PICOS, length of follow-up) and report characteristics (e.g., years considered, language, publication status) used as criteria for eligibility, giving rationale.                                                                                                      | pp. 4-5, Fig 1, Table 1 |
| Information sources                | 7  | Describe all information sources (e.g., databases with dates of coverage, contact with study authors to identify additional studies) in the search and date last searched.                                                                                                                                  | p. 4, Fig 1, Appendix C |
| Search                             | 8  | Present full electronic search strategy for at least one database, including any limits used, such that it could be repeated.                                                                                                                                                                               | Appendix C              |
| Study selection                    | 9  | State the process for selecting studies (i.e., screening, eligibility, included in systematic review, and, if applicable, included in the meta-analysis).                                                                                                                                                   | pp. 4-5, Fig 1          |
| Data collection process            | 10 | Describe method of data extraction from reports (e.g., piloted forms, independently, in duplicate) and any processes for obtaining and confirming data from investigators.                                                                                                                                  | pp. 4-5, Fig 1          |
| Data items                         | 11 | List and define all variables for which data were sought (e.g., PICOS, funding sources) and any assumptions and simplifications made.                                                                                                                                                                       | pp. 4-5, Fig 1          |
| Risk of bias in individual studies | 12 | Describe methods used for assessing risk of bias of individual studies (including specification of whether this was done at the study or outcome level), and how this information is to be used in any data synthesis.                                                                                      | pp. 5-6                 |
| Summary measures                   | 13 | State the principal summary measures (e.g., risk ratio, difference in means).                                                                                                                                                                                                                               | pp. 5-6                 |
| Synthesis of results               | 14 | Describe the methods of handling data and combining results of studies, if done, including measures of                                                                                                                                                                                                      | pp. 5-6                 |

## Appendix C PRISMA 2009 Checklist

|  |  |                                                    |  |
|--|--|----------------------------------------------------|--|
|  |  | consistency (e.g., $I^2$ ) for each meta-analysis. |  |
|--|--|----------------------------------------------------|--|

Page 1 of 2

| Section/topic                 | #  | Checklist item                                                                                                                                                                                           | Reported on page #  |
|-------------------------------|----|----------------------------------------------------------------------------------------------------------------------------------------------------------------------------------------------------------|---------------------|
| Risk of bias across studies   | 15 | Specify any assessment of risk of bias that may affect the cumulative evidence (e.g., publication bias, selective reporting within studies).                                                             | pp. 5-6             |
| Additional analyses           | 16 | Describe methods of additional analyses (e.g., sensitivity or subgroup analyses, meta-regression), if done, indicating which were pre-specified.                                                         | pp. 5-6             |
| <b>RESULTS</b>                |    |                                                                                                                                                                                                          |                     |
| Study selection               | 17 | Give numbers of studies screened, assessed for eligibility, and included in the review, with reasons for exclusions at each stage, ideally with a flow diagram.                                          | Fig 1               |
| Study characteristics         | 18 | For each study, present characteristics for which data were extracted (e.g., study size, PICOS, follow-up period) and provide the citations.                                                             | pp. 6-7, Appendix A |
| Risk of bias within studies   | 19 | Present data on risk of bias of each study and, if available, any outcome level assessment (see item 12).                                                                                                | pp. 7-11            |
| Results of individual studies | 20 | For all outcomes considered (benefits or harms), present, for each study: (a) simple summary data for each intervention group (b) effect estimates and confidence intervals, ideally with a forest plot. | pp. 7-11, Table 2   |
| Synthesis of results          | 21 | Present results of each meta-analysis done, including confidence intervals and measures of consistency.                                                                                                  | pp. 7-11, Table 2   |
| Risk of bias across studies   | 22 | Present results of any assessment of risk of bias across studies (see Item 15).                                                                                                                          | pp. 7-11            |
| Additional analysis           | 23 | Give results of additional analyses, if done (e.g., sensitivity or subgroup analyses, meta-regression [see Item 16]).                                                                                    | pp. 7-11            |
| <b>DISCUSSION</b>             |    |                                                                                                                                                                                                          |                     |
| Summary of evidence           | 24 | Summarize the main findings including the strength of evidence for each main outcome; consider their relevance to key groups (e.g., healthcare providers, users, and policy makers).                     | pp. 11-15           |
| Limitations                   | 25 | Discuss limitations at study and outcome level (e.g., risk of bias), and at review-level (e.g., incomplete retrieval of identified research, reporting bias).                                            | p. 15               |
| Conclusions                   | 26 | Provide a general interpretation of the results in the context of other evidence, and implications for future research.                                                                                  | pp. 15-16           |
| <b>FUNDING</b>                |    |                                                                                                                                                                                                          |                     |
| Funding                       | 27 | Describe sources of funding for the systematic review and other support (e.g., supply of data); role of funders for the systematic review.                                                               | Title page          |

## Appendix C PRISMA 2009 Checklist

*From:* Moher D, Liberati A, Tetzlaff J, Altman DG, The PRISMA Group (2009). Preferred Reporting Items for Systematic Reviews and Meta-Analyses: The PRISMA Statement. PLoS Med 6(7): e1000097. doi:10.1371/journal.pmed1000097

For more information, visit: [www.prisma-statement.org](http://www.prisma-statement.org).
